# Supplementary material for: Clinical application of whole transcriptome sequencing for the classification of patients with acute lymphoblastic leukemia
Source: PubMed Central journal article supplement (PMC8330044; doi:10.1186/s12885-021-08635-5), 2021-08-02

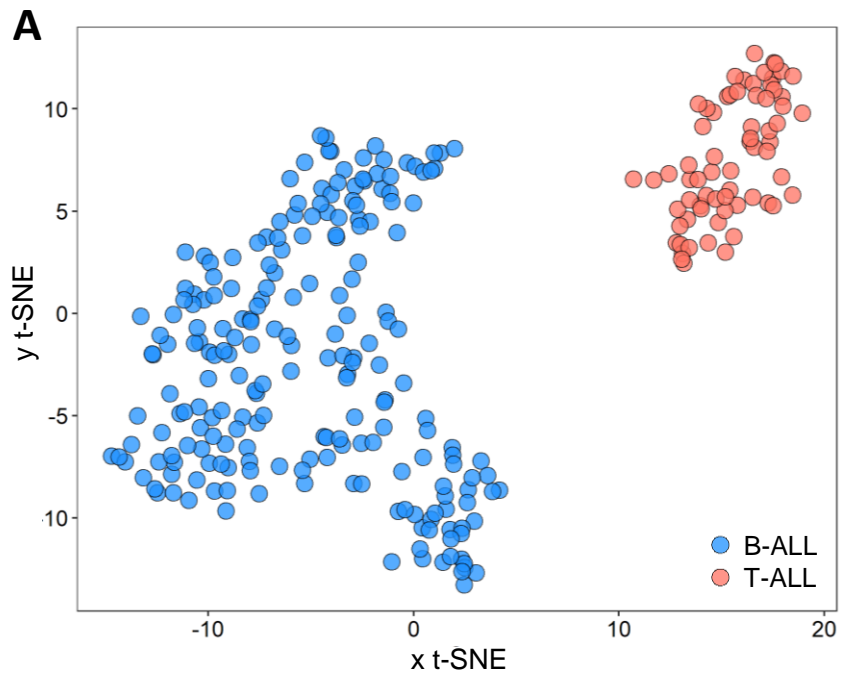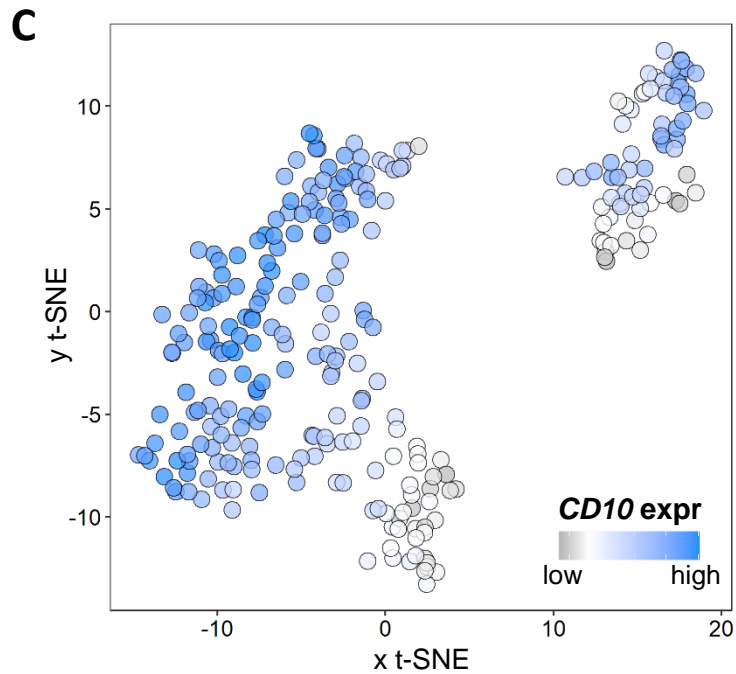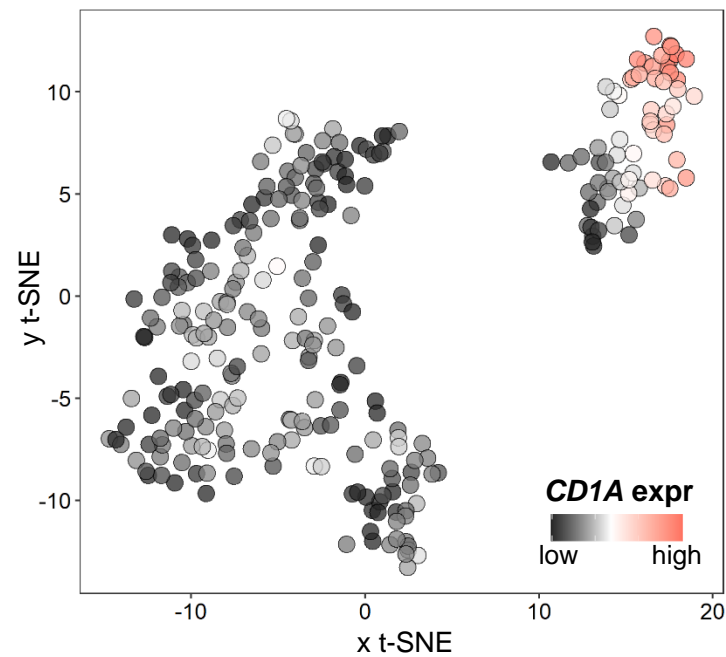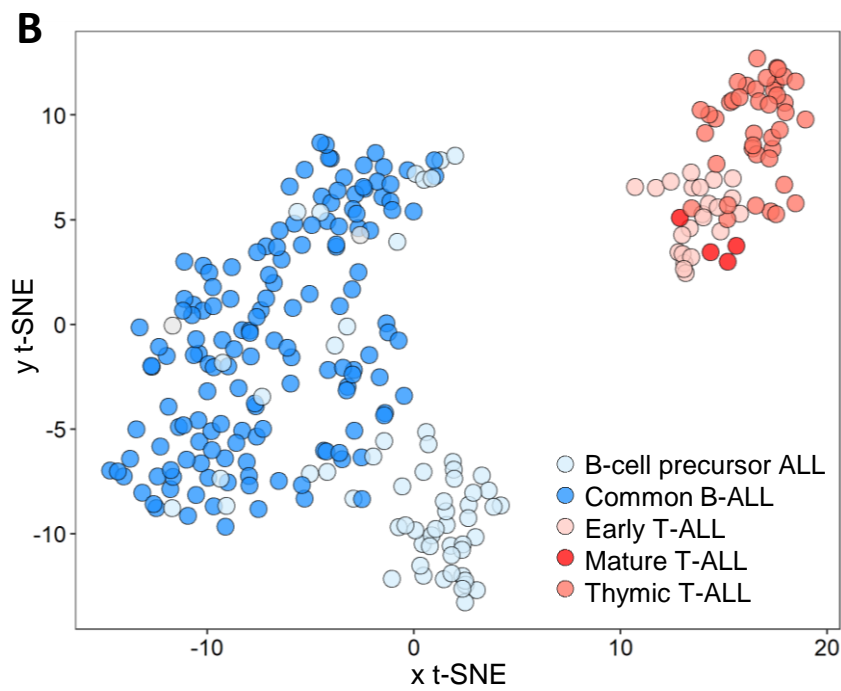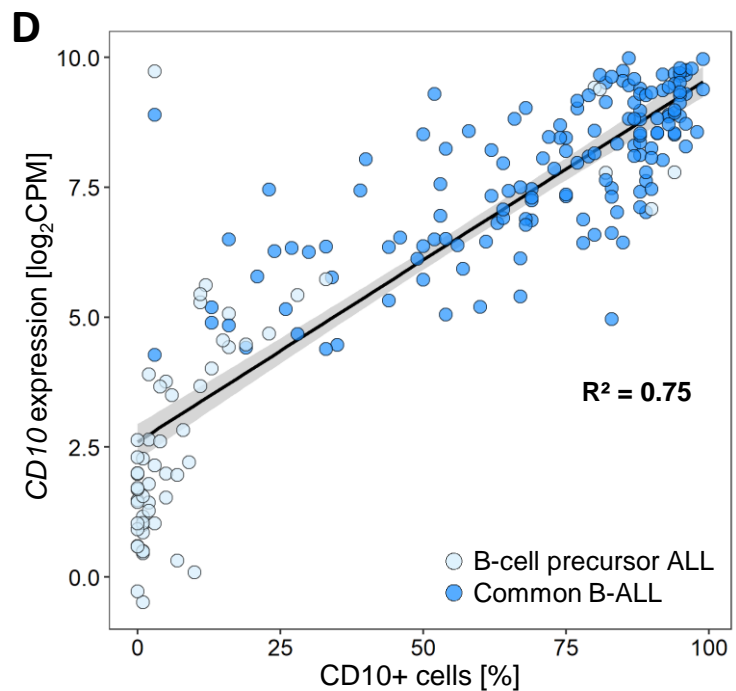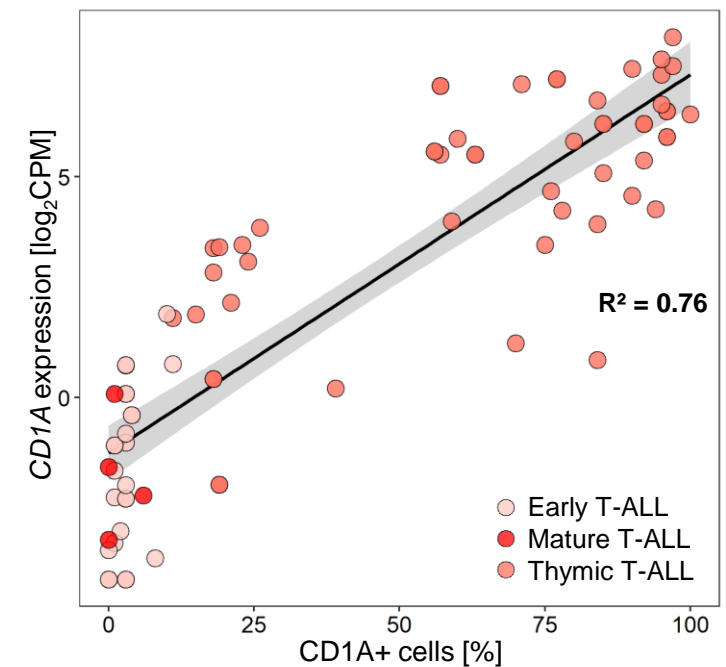

Supplement: 12885_2021_8635_MOESM1_ESM.pdf [file 12885_2021_8635_MOESM1_ESM.pdf]
